# Supplementary material for: Comparative Kinetic Analysis of Triclosan Degradation under UV-C and Simulated Solar Irradiation
Source: MDPI journal article supplement (doi:10.3390/separations11050131), 2024-04-25
Supplement: s1 [file s1]

## Supplementary Information

**Table S1.** Analysis of variance for the influence of time and irradiation on the degradation efficiency for TCS under simulated solar irradiation

| Source of Variation  | Sum of Squares | Degrees of Freedom | Mean Square | F      | p-value<br>Prob > F |
|----------------------|----------------|--------------------|-------------|--------|---------------------|
| <b>Model</b>         | 2346.36        | 5                  | 469.27      | 6.14   | 0.0236              |
| <b>T</b>             | 781.84         | 1                  | 781.84      | 10.22  | 0.0187              |
| <b>I</b>             | 708.73         | 1                  | 708.73      | 9.27   | 0.0227              |
| <b>T·I</b>           | 3.40           | 1                  | 3.40        | 0.0445 | 0.8399              |
| <b>T<sup>2</sup></b> | 521.23         | 1                  | 521.23      | 6.82   | 0.0401              |
| <b>I<sup>2</sup></b> | 548.65         | 1                  | 548.65      | 7.18   | 0.0366              |
| <b>Residual</b>      | 458.80         | 6                  | 76.47       |        |                     |
| <b>Lack of fit</b>   | 457.99         | 3                  | 152.66      | 568.94 | 0.0001              |
| <b>Error</b>         | 0.8050         | 3                  | 0.2683      |        |                     |
| <b>Total</b>         | 2805.16        | 11                 |             |        |                     |

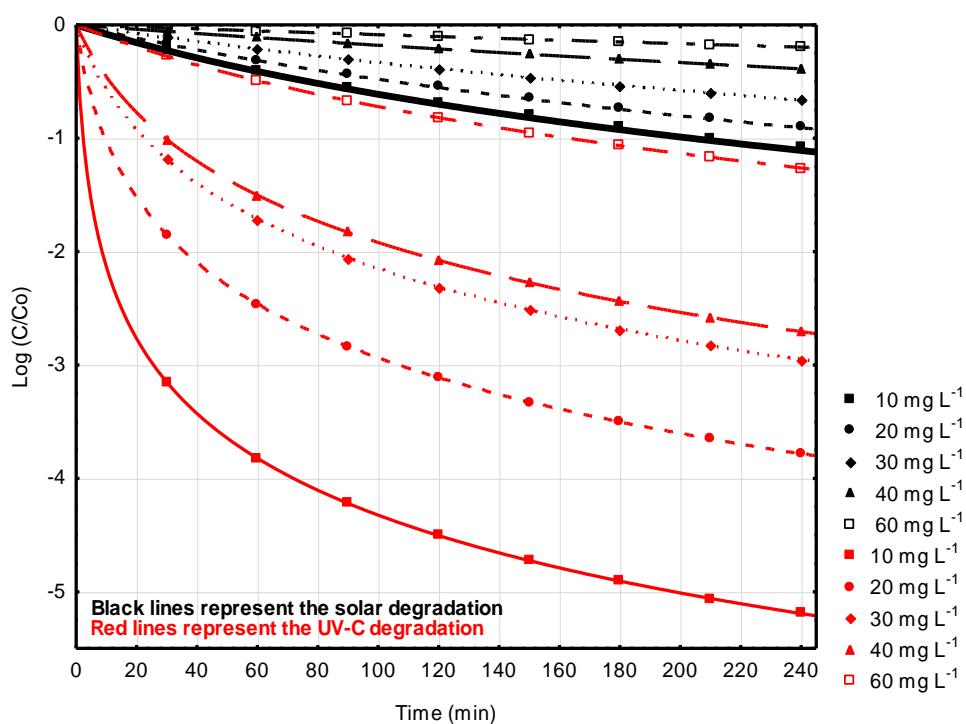

**Figure S1.** Effect of the initial concentration of TCS at 25 °C on UV-C and solar photodegradation. Lines represent the logarithmic second- order kinetic curves.

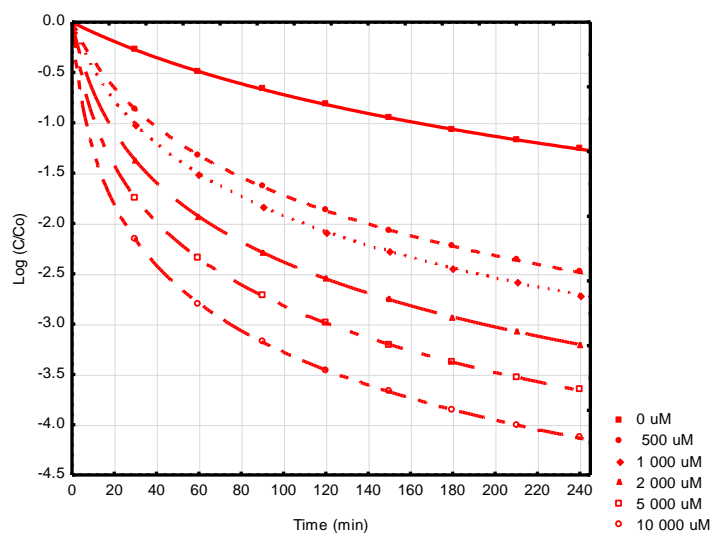

a)

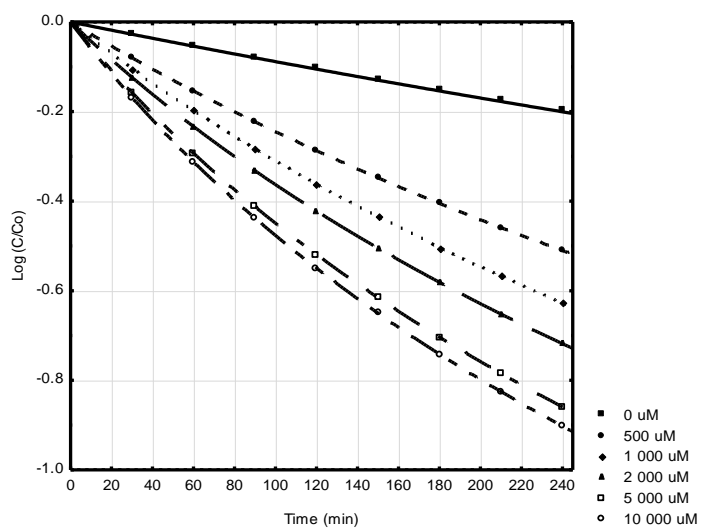

b)

**Figure S2.** Photodegradation degradation curves (logarithmic) of TCS in a) UV-C/S<sub>2</sub>O<sub>8</sub><sup>2-</sup> and b) sunlight/S<sub>2</sub>O<sub>8</sub><sup>2-</sup> systems. [TCS]<sub>0</sub> = 60 mg L<sup>-1</sup>; pH = 7.0.
